# Supplementary material for: Role of dendritic cells and B cells in the skin of imiquimod (IMQ)-induced psoriasis-like mouse model
Source: PeerJ journal article supplement (doi:10.7717/peerj.20974), 2026-03-30
Supplement: Supplemental_data_Table_1.pdf [file Supplemental_data_Table_1.pdf]

Supplemental Data: Table 1

| Parameter                      | Day | Control<br>(mean $\pm$ SD) | IMQ-induced<br>(mean $\pm$ SD) | Median Difference | 95% CI | <i>p</i> -value | Significance |
|--------------------------------|-----|----------------------------|--------------------------------|-------------------|--------|-----------------|--------------|
| <b>Skinfold thickness (mm)</b> |     |                            |                                |                   |        |                 |              |
| Day 3 experiment               | 1   | 0.517 $\pm$ 0.060          | 0.700 $\pm$ 0.050              | 0.25              | -      | 0.100           | NS           |
|                                | 2   | 0.517 $\pm$ 0.060          | 0.800 $\pm$ 0.060              | 0.30              | -      | 0.009           | **           |
|                                | 3   | 0.533 $\pm$ 0.056          | 0.950 $\pm$ 0.070              | 0.50              | -      | 0.002           | **           |
| Day 5 experiment               | 1   | 0.417 $\pm$ 0.017          | 0.433 $\pm$ 0.021              | 0.00              | -      | >0.999          | NS           |
|                                | 2   | 0.417 $\pm$ 0.017          | 0.550 $\pm$ 0.022              | 0.15              | -      | 0.009           | **           |
|                                | 3   | 0.400 $\pm$ 0.000          | 0.917 $\pm$ 0.091              | 0.4               | -      | 0.002           | **           |
|                                | 4   | 0.400 $\pm$ 0.000          | 1.033 $\pm$ 0.088              | 0.55              | -      | 0.002           | **           |
|                                | 5   | 0.400 $\pm$ 0.000          | 1.117 $\pm$ 0.111              | 0.60              | -      | 0.002           | **           |
| Day 7 experiment               | 1   | 0.500 $\pm$ 0.000          | 0.500 $\pm$ 0.000              | 0.00              | -      | >0.999          | NS           |
|                                | 2   | 0.500 $\pm$ 0.000          | 0.667 $\pm$ 0.062              | 0.10              | -      | 0.015           | *            |
|                                | 3   | 0.500 $\pm$ 0.000          | 0.700 $\pm$ 0.063              | 0.20              | -      | 0.002           | **           |
|                                | 4   | 0.500 $\pm$ 0.000          | 0.783 $\pm$ 0.075              | 0.30              | -      | 0.002           | **           |
|                                | 5   | 0.500 $\pm$ 0.000          | 1.000 $\pm$ 0.103              | 0.50              | -      | 0.002           | **           |
|                                | 6   | 0.500 $\pm$ 0.000          | 1.100 $\pm$ 0.134              | 0.65              | -      | 0.002           | **           |
|                                | 7   | 0.500 $\pm$ 0.000          | 1.200 $\pm$ 0.110              | 0.75              | -      | 0.002           | **           |
| <b>PASI score</b>              |     |                            |                                |                   |        |                 |              |
| Day 3 experiment               | 1   | 0.000 $\pm$ 0.000          | 0.000 $\pm$ 0.000              | 0.00              | -      | 0.400           | NS           |
|                                | 2   | 0.000 $\pm$ 0.000          | 2.167 $\pm$ 0.167              | 2.00              | -      | 0.002           | **           |
|                                | 3   | 0.000 $\pm$ 0.000          | 5.333 $\pm$ 0.211              | 5.00              | -      | 0.002           | **           |
| Day 5 experiment               | 1   | 0.000 $\pm$ 0.000          | 0.000 $\pm$ 0.000              | 0.00              | -      | 0.002           | **           |
|                                | 2   | 0.000 $\pm$ 0.000          | 2.167 $\pm$ 0.167              | 0.20              | -      | 0.002           | **           |
|                                | 3   | 0.000 $\pm$ 0.000          | 5.333 $\pm$ 0.211              | 5.00              | -      | 0.002           | **           |
|                                | 4   | 0.000 $\pm$ 0.000          | 5.333 $\pm$ 0.212              | 5.00              | -      | 0.002           | **           |
|                                | 5   | 0.000 $\pm$ 0.000          | 6.500 $\pm$ 0.341              | 6.00              | -      | 0.002           | **           |
|                                | 1   | 0.000 $\pm$ 0.000          | 0.000 $\pm$ 0.000              | 0.00              | -      | 0.400           | NS           |

|                                                       |                            |                |                |       |                |         |      |
|-------------------------------------------------------|----------------------------|----------------|----------------|-------|----------------|---------|------|
| Day 7 experiment                                      | 2                          | 0.000 ± 0.000  | 2.167 ± 0.167  | 2.00  | -              | 0.002   | **   |
|                                                       | 3                          | 0.000 ± 0.000  | 5.333 ± 0.211  | 5.00  | -              | 0.002   | **   |
|                                                       | 4                          | 0.000 ± 0.000  | 5.333 ± 0.212  | 5.00  | -              | 0.002   | **   |
|                                                       | 5                          | 0.000 ± 0.000  | 6.500 ± 0.342  | 6.00  | -              | 0.002   | **   |
|                                                       | 6                          | 0.000 ± 0.000  | 6.833 ± 0.307  | 7.00  | -              | 0.002   | **   |
|                                                       | 7                          | 0.000 ± 0.000  | 7.500 ± 0.548  | 7.50  | -              | 0.002   | **   |
|                                                       | <b>Cell population (%)</b> |                |                |       |                |         |      |
| CD11c <sup>+</sup> MHCII <sup>+</sup><br>DCs          | 3                          | 0.856 ± 0.618  | 26.220 ± 7.000 | 26.83 | 18.97 – 31.75  | <0.0100 | **   |
|                                                       | 5                          | 19.050 ± 4.020 | 22.470 ± 2.960 | 2.70  | -1.13 – 7.96   | 0.1250  | NS   |
|                                                       | 7                          | 10.790 ± 1.867 | 34.970 ± 4.589 | 25.10 | 19.67 – 28.68  | <0.0001 | **** |
| CD19 <sup>+</sup> CD38 <sup>+</sup> B<br>Cells        | 3                          | 28.35 ± 22.70  | 29.05 ± 22.60  | 0.70  | -10.20 – 10.13 | 0.9943  | NS   |
|                                                       | 5                          | 6.75 ± 1.74    | 9.85 ± 1.78    | 3.45  | 0.83 – 5.37    | 0.0124  | *    |
|                                                       | 7                          | 14.17 ± 3.53   | 41.02 ± 9.46   | 29.55 | 17.66 – 36.04  | <0.0001 | **** |
| <b>Gene expression (relative gene quantification)</b> |                            |                |                |       |                |         |      |
| <i>CD11c</i>                                          | 3                          | 0.742 ± 0.445  | 1.307 ± 0.984  | 0.27  | -0.42 – 1.55   | 0.2287  | NS   |
|                                                       | 5                          | 0.567 ± 0.216  | 1.802 ± 0.799  | 0.88  | 0.48 – 1.99    | 0.0044  | **   |
|                                                       | 7                          | 0.567 ± 0.216  | 2.130 ± 0.980  | 1.53  | 0.42 – 2.10    | 0.0075  | **   |
| <i>H2-Aa</i>                                          | 3                          | 0.996 ± 0.286  | 1.557 ± 0.087  | 0.731 | -0.10 – 1.23   | 0.0895  | NS   |
|                                                       | 5                          | 0.957 ± 0.311  | 1.864 ± 0.299  | 0.67  | 0.05 – 1.87    | 0.0616  | NS   |
|                                                       | 7                          | 0.713 ± 0.220  | 2.024 ± 0.378  | 1.25  | 0.91 – 1.71    | <0.0001 | **** |
| <i>BAFF</i>                                           | 3                          | 1.046 ± 0.341  | 1.427 ± 0.628  | 0.78  | -0.27 – 1.03   | 0.2210  | NS   |
|                                                       | 5                          | 1.189 ± 0.592  | 1.915 ± 0.775  | 0.48  | -0.16 – 1.61   | 0.0980  | NS   |
|                                                       | 7                          | 0.819 ± 0.549  | 2.132 ± 0.948  | 1.31  | 0.32 – 2.31    | 0.0150  | *    |
| <i>IL-10</i>                                          | 3                          | 0.878 ± 0.649  | 1.822 ± 0.515  | 0.92  | 0.19 – 1.70    | 0.0190  | *    |
|                                                       | 5                          | 0.976 ± 0.583  | 2.072 ± 0.871  | 0.84  | 0.14 – 2.05    | 0.0280  | *    |
|                                                       | 7                          | 0.707 ± 0.709  | 0.468 ± 0.324  | 0.00  | -0.95 – 0.47   | 0.4710  | NS   |
| <i>IL-6</i>                                           | 3                          | 0.431 ± 0.314  | 1.590 ± 0.923  | 1.14  | 0.27 – 2.05    | 0.0155  | *    |
|                                                       | 5                          | 0.544 ± 0.302  | 1.715 ± 1.149  | 0.69  | -              | 0.0152  | *    |
|                                                       | 7                          | 0.463 ± 0.370  | 1.732 ± 0.487  | 1.28  | 0.71 – 1.83    | 0.0005  | ***  |
| <i>CXCR5</i>                                          | 3                          | 0.402 ± 0.767  | 1.482 ± 1.094  | 1.08  | -              | 0.0260  | *    |
|                                                       | 5                          | 0.518 ± 0.239  | 1.475 ± 0.384  | 0.91  | 0.55 – 1.37    | 0.0004  | **   |

---

|   |               |               |      |             |        |    |
|---|---------------|---------------|------|-------------|--------|----|
| 7 | 0.519 ± 0.257 | 1.798 ± 0.567 | 1.35 | 0.71 – 1.85 | 0.0005 | ** |
|---|---------------|---------------|------|-------------|--------|----|

---

Note: SD = standard deviation, CI = confidence interval, - = not applicable, \* $p < 0.05$ , \*\* $p < 0.01$ , \*\*\* $p < 0.001$ , \*\*\*\* $p < 0.0001$ , NS = not significant
